# Supplementary material for: Comprehensive molecular and cellular studies suggest avian scutate scales are secondarily derived from feathers, and more distant from reptilian scales
Source: PubMed Central journal article supplement (PMC6233204; doi:10.1038/s41598-018-35176-y), 2018-11-13
Supplement: 41598_2018_35176_MOESM1_ESM.pdf [file 41598_2018_35176_MOESM1_ESM.pdf]

# Comprehensive molecular and cellular studies suggest avian scutate scales are secondarily derived from feathers, and more distant from reptilian scales

Ping Wu<sup>1</sup>, Yung-Chih Lai<sup>1,2</sup>, Randall Widelitz<sup>1</sup>, Cheng-Ming Chuong<sup>1,2,3\*</sup>

<sup>1</sup>Department of Pathology, Keck School of Medicine, Univ. Southern California, Los Angeles, CA 90033

<sup>2</sup>Integrative Stem Cell Center, China Medical University Hospital, China Medical University, Taichung 40402, Taiwan

<sup>3</sup>International laboratory for Wound Repair and Regenerative Research, Graduated Institute of Clinical Medicine, National Cheng Kung University, Tainan, Taiwan.

## Supplementary

**Figure. S1.** List of 86 annotated alligator genes among the 102 chicken *feather-associated genes*

ADAM12, CCDC170, GGT5, KLHL4, NTN3, RUSC2, TEK, ADAMTSL2, GLIS1, LIMCH1, OSR1, SATB2, ADCY5, CLGN, EPB41L3, LOXL3, SIM1, TLN2, AFF3, CPLX2, EPHA5, HBE, LRIG1, PAMR1, LC22A16, TMTC1, CPXM2, ESM1, HPGD, LRRC16A, PDE1A, SMOG1, Ahrr, DNAH10, HRH2, LRRC4C, PGBD5, SOX18, TPD52L1, ALCAM, DRAXIN, FAT3, HSPA4L, Lrrn1, PGM5, ST8SIA6, TSPO2, ANO1, EFEMP1, FBLN1, IGF2, PHLDB2, STEAP3, UBASH3B, ARHGAP25, EMX2, FLNB, JUN, MMEL1, PPP4R4, STK10, ZIC1, ARHGEF3, *foxp2*, KCNH5, MSANTD1, RAI2, STRA6, ZIC3, FRMD3, KCNS2, MYOCD, RGMA, SYNDIG1, ZP2, BEND5, FST, KIAA2022, NEFM, RND3, SYT6, GAD2, KIFAP3, NT5E, RUNX3, TBX15

**Figure. S2.** List of 135 annotated alligator genes among the 170 chicken *scale-associated genes*

GSN, FKBP9, ATF4, COL2A1, MDK, COL16A1, SCARF2, PPM1D, HIF1A, MEOX2, SNCAIP, AQP1, P4HA3, FKBP7, SVEP1, FAM101B, PIEZO2, ADAMTS3, SLIT2, WBSCR17, SELM, GTF2IRD1, CACNA1G, HTRA3, FAM46A, BCL6, LMO4, ST3GAL1, CD82, CHST15, IGFBP2, IGSF10, PLBD2, FKBP14, TBX4, TMEM47, NPTX2, NDRG1, RNF34, PRKD1, PANK1, TSHZ1, DVL1, CDH13, ARSI, TLE1, WASF3, IL17REL, KIAA0226L, TPCN1, DACT2, SULT1E1, ATCAY, SLITRK4, NFKBIA, TMEM132E, PDLIM5, KIAA0513, TMEFF2, TPST1, NFATC2, KLHL25, DOCK5, TRIM47, SOHO-1, ZFPM1, DCLK2, SFRP4, COL17A1, FRMPD4, KCNMB4, ASTN1, ELFN1, PITPNM3, PRDM6, CDH1, CDKL1, MDGA2, ATP6AP1L, PLCB1, NTNG1, SHOX, GALNT5, GLRA4, RTN4RL1, PROX1, PKP2, PITX1, LHX9, IL18, PIK3R5, DACH1, CADM2, NT5C1A, NPAS2, SBK1, ADARB2, CHAC1, OPRD1, GABRA1, PI16, RHOV, ASPHD2, TPH2, TFAP2B, CDKN2C, VWC2, STK32A, DRD5, PPM1H, TOX, MOV10L1, RCAN2, PYROXD2, GPR143, Wnt10a, SCN4B, CALCR, MGAT4C, SLC17A9, VGLL1, PRDM12, PTPRO, TMEM215, TEKT5, AJAP1, GLIS3, Wnt3, NRG3, TRPM6, GRIN2C, ADCYAP1R1, SLC34A2, KY, Gnot1
